# Supplementary material for: Betaine host–guest complexation with a calixarene receptor: enhanced in vitro anticancer effect
Source: Royal Society of Chemistry journal article supplement (doi:10.1039/d1ra04614d), 2021-01-01
Supplement: d1ra04614d1.pdf [file d1ra04614d1.pdf]

## **Betaine Host-Guest Complexation with a Calixarene Receptor: Enhanced *In Vitro* Anticancer effect**

**Sherif Ashraf Fahmy<sup>1</sup> Fortuna Ponte<sup>2</sup> Iten M. Fawzy<sup>3</sup> Emilia Sicilia<sup>2</sup>, , Hassan Mohamed El-Said Azzazy<sup>1,\*</sup>**

<sup>1</sup> Department of Chemistry, School of Sciences & Engineering, The American University in Cairo, AUC Avenue, PO. Box 74, New Cairo 11835, Egypt; [sheriffahmy@aucegypt.edu](mailto:sheriffahmy@aucegypt.edu)

<sup>2</sup> Department of Chemistry and Chemical Technologies, University of Calabria, Arcavacata di Rende, 87036, Italy; [fortuna.ponte@unical.it](mailto:fortuna.ponte@unical.it); [emilia.sicilia@unical.it](mailto:emilia.sicilia@unical.it)

<sup>3</sup> Pharmaceutical Chemistry Department, Faculty of Pharmaceutical Sciences and Pharmaceutical Industries, Future University in Egypt, Cairo 12311, Egypt; [iten.mamdouh@fue.edu.eg](mailto:iten.mamdouh@fue.edu.eg)

\* Correspondence: [hazzazy@aucegypt.edu](mailto:hazzazy@aucegypt.edu) (H.M.E.-S.A.);

Tel.: +2 02 2615 2559; Fax: +2 02 2795 7565 (H.M.E.-S.A.)

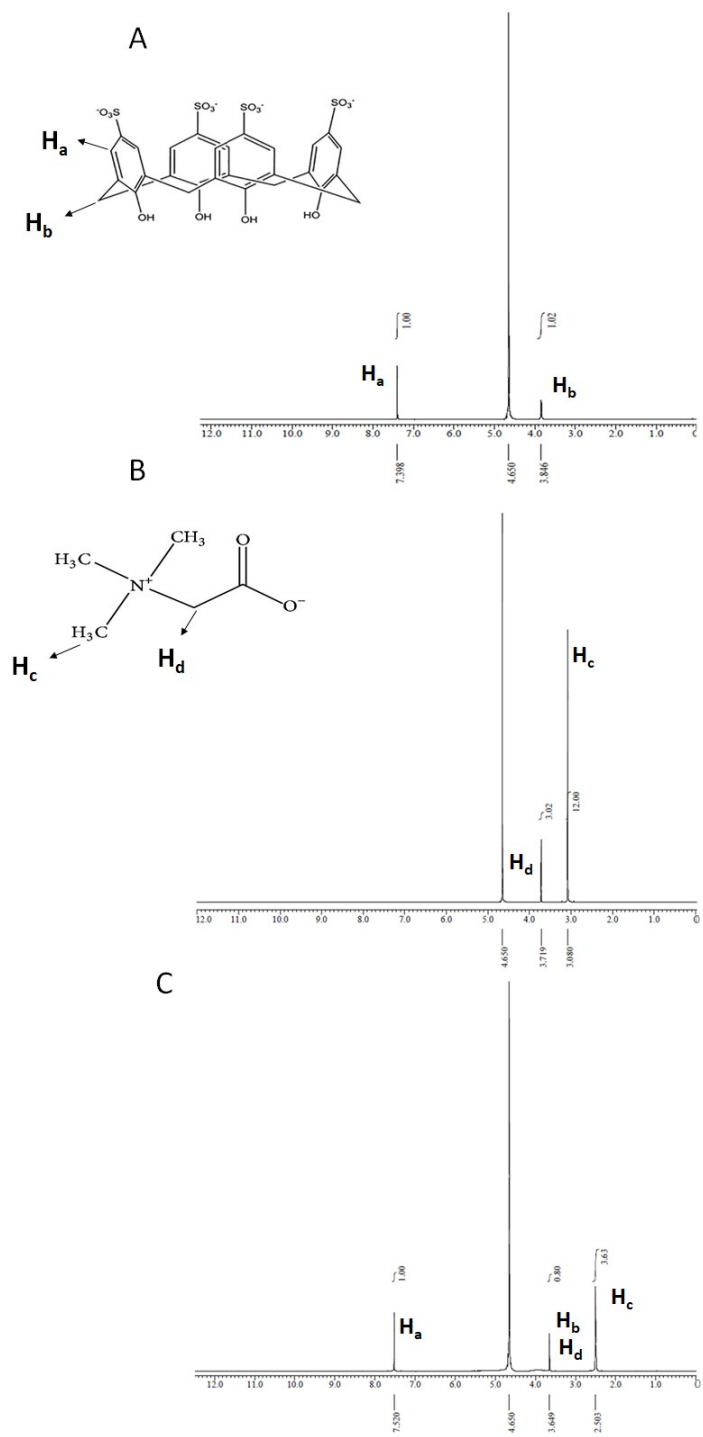

**Figure S1.**  $^1\text{H}$ NMR spectra of (A) individual *p*-SC4, (B) individual betaine, and (C) equimolar ratio of amount of betaine and *p*-SC4. Structures of *p*-SC4 and betaine are shown with appropriate protons labeled.

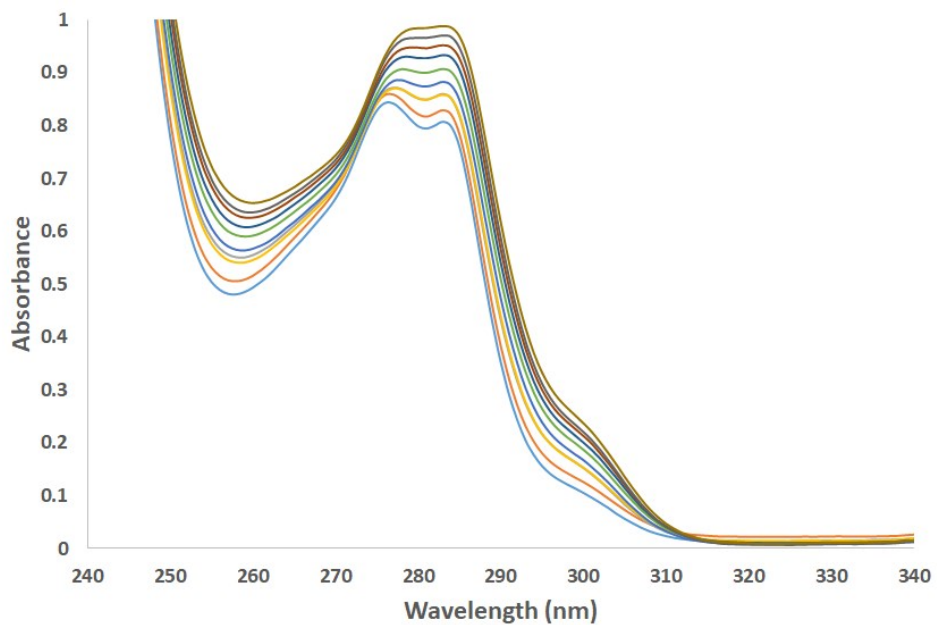

**Figure S2.** Absorbance spectra of several mixtures containing increasing concentrations of betaine (0.01–0.25 mM) and a fixed concentration of 0.2 mM *p*-SC4; all in distilled water.
